# Supplementary material
Source: HighWire-hosted journal article supplement (https://www.jneurosci.org/content/42/21/4231)
Supplement: inline-supplementary-material-8 [file inline-supplementary-material-8.xlsx]

## Sheet: Sheet1
Extended Figure 2-1: Table related to Figure 2B: Rod-HCN1 KO scotopic a-wave amplitude (μV)
cd.s/m2	Rod-Control			Rod-HCN1 KO			Rod-Control - Rod-HCN1 KO		adj p	significant
	mean	st dev	N	mean	st dev	N	mean	95% CI
0.003	2.14243	19.7111	7	4.97311	6.36603	9	-2.831	-32.60 to 26.93	>0.9999	ns
0.01	31.38	5.64794	7	49.2022	8.77698	9	-17.82	-29.47 to -6.171	0.0019	**
0.1	159.25	20.3768	7	195.506	16.9051	9	-36.26	-67.90 to -4.606	0.0212	*
1	291.371	24.9178	7	320.144	16.5657	9	-28.77	-66.31 to 8.767	0.1835	ns
3	244.557	11.9075	7	267.606	13.9137	9	-23.05	-43.79 to -2.307	0.025	*
10	287.207	24.0341	7	313.728	22.4323	9	-26.52	-64.95 to 11.91	0.295	ns
30	287.243	26.8825	7	311.306	25.1279	9	-24.06	-67.06 to 18.94	0.5358	ns
100	335.471	36.1515	7	369.933	20.5588	9	-34.46	-88.50 to 19.58	0.3406	ns
ANOVA table	SS	DF	MS	F (DFn, DFd)		P value
Intensity x Genotype	3054	7	436.3	F (7, 98) = 1.955		P=0.0690
Intensity	1888580	7	269797	F (2.034, 28.48) = 1209		P<0.0001
Genotype	18481	1	18481	F (1, 14) = 11.35		P=0.0046
Subject	22794	14	1628	F (14, 98) = 7.296		P<0.0001
Residual	21869	98	223.2
Extended Figure 2-2: Table related to Figure 2B: rod-HCN1 KO scotopic b-wave amplitude (μV)
cd.s/m2	Rod-Control			Rod-HCN1 KO			Rod-Control - Rod-HCN1 KO		adj p	significant
	mean	st dev	N	mean	st dev	N	mean	95% CI
0.003	296.65	28.2048	7	300.278	24.9007	9	-3.628	-48.05 to 40.80	>0.9999	ns
0.01	408.221	33.4063	7	375.022	21.5511	9	33.2	-17.02 to 83.42	0.0019	**
0.1	533.414	54.8363	7	540.944	37.3946	9	-7.53	-90.32 to 75.26	0.0212	*
1	719.85	59.772	7	754.744	40.2566	9	-34.89	-125.0 to 55.25	0.1835	ns
3	724.329	68.375	7	763.839	49.4431	9	-39.51	-143.4 to 64.37	0.025	*
10	720.043	84.1109	7	754.828	80.435	9	-34.78	-170.2 to 100.7	0.295	ns
30	647.3	100.489	7	644.811	79.6546	9	2.489	-152.3 to 157.2	0.5358	ns
100	808.814	116.65	7	806.483	66.6297	9	2.331	-172.1 to 176.7	0.3406	ns
ANOVA table	SS	DF	MS	F (DFn, DFd)		P value
Intensity x Genotype	17030	7	2433	F (7, 98) = 1.388		P=0.2189
Intensity	3792372	7	541767	F (2.298, 32.17) = 309.1		P<0.0001
Genotype	3336	1	3336	F (1, 14) = 0.1654		P=0.6904
Subject	282323	14	20166	F (14, 98) = 11.51		P<0.0001
Residual	171772	98	1753
Extended Figure 2-3: Table related to Figure 2C: a-wave time to peak (ms)
cd.s/m2	Rod-Control			Rod-HCN1 KO			Rod-Control - Rod-HCN1 KO		adj p	significant
	mean	st dev	N	mean	st dev	N	mean	95% CI
0.003	21.4286	2.96758	7	25.5833	4.12879	9	-4.155	-9.844 to 1.534	0.2459	ns
0.01	22.5	1.68943	7	23.8056	1.5997	9	-1.306	-4.018 to 1.407	0.7041	ns
0.1	18.1786	1.25594	7	19.0278	1.39443	9	-0.8492	-2.987 to 1.288	0.8665	ns
1	15	1.25	7	16.1944	1.18439	9	-1.194	-3.202 to 0.8131	0.4639	ns
3	9.32143	0.965167	7	10.1667	1.53603	9	-0.8452	-2.870 to 1.180	0.8337	ns
10	8	0.661438	7	8.25	0.760345	9	-0.25	-1.393 to 0.8933	0.9957	ns
30	6.85714	0.475595	7	6.97222	0.403973	9	-0.1151	-0.8575 to 0.6273	0.9995	ns
100	5.64286	0.475595	7	6.05556	0.242956	9	-0.4127	-1.123 to 0.2975	0.4304	ns
ANOVA table	SS	DF	MS	F (DFn, DFd)		P value
Intensity x Genotype	45.92	7	6.56	F (7, 98) = 4.264		P=0.0004
Intensity	5782	7	826	F (1.513, 21.18) = 536.8		P<0.0001
Genotype	41	1	41	F (1, 14) = 3.636		P=0.0773
Subject	157.9	14	11.28	F (14, 98) = 7.328		P<0.0001
Residual	150.8	98	1.539
Extended Figure 2-4: Table related to Figure 2C: b-wave time to peak (ms)
cd.s/m2	Rod-Control			Rod-HCN1 KO			Rod-Control - Rod-HCN1 KO		adj p	significant
	mean	st dev	N	mean	st dev	N	mean	95% CI
0.003	53.7857	6.39242	7	57.6389	7.00236	9	-3.853	-14.67 to 6.964	0.9204	ns
0.01	39.1071	2.5975	7	41.7778	2.89516	9	-2.671	-7.099 to 1.758	0.4563	ns
0.1	28.3214	1.95104	7	31.1111	2.9451	9	-2.79	-6.734 to 1.155	0.2768	ns
1	26.1429	2.1353	7	27.3333	2.08041	9	-1.19	-4.650 to 2.269	0.9307	ns
3	24	2.57795	7	25.1944	2.23529	9	-1.194	-5.237 to 2.849	0.9679	ns
10	26.2857	2.63165	7	27.4722	2.50139	9	-1.187	-5.417 to 3.044	0.9775	ns
30	27.6071	3.21084	7	31.3611	6.55042	9	-3.754	-11.97 to 4.457	0.7484	ns
100	25.1786	2.9073	7	27.5278	3.24144	9	-2.349	-7.306 to 2.608	0.7281	ns
ANOVA table	SS	DF	MS	F (DFn, DFd)		P value
Intensity x Genotype	33.69	7	4.813	F (7, 98) = 0.6858		P=0.6838
Intensity	12344	7	1763	F (2.445, 34.23) = 251.3		P<0.0001
Genotype	177.5	1	177.5	F (1, 14) = 2.692		P=0.1231
Subject	922.8	14	65.91	F (14, 98) = 9.392		P<0.0001
Residual	687.7	98	7.018
Extended Figure 2-5: Table related to Figure 2D: amplitude 100 ms post flash (μV)
cd.s/m2	Rod-Control			Rod-HCN1 KO			Rod-Control - Rod-HCN1 KO		adj p	significant
	mean	st dev	N	mean	st dev	N	mean	95% CI
0.003	368.637	49.61	7	417.027	50.578	9	-48.39	-130.0 to 33.24	0.4729	ns
0.01	349.912	39.2826	7	438.924	28.9419	9	-89.01	-148.8 to -29.19	0.0033	**
0.1	189.817	20.6004	7	306.463	30.7461	9	-116.6	-158.0 to -75.32	<0.0001	****
1	186.141	33.2718	7	313.877	27.4801	9	-127.7	-179.4 to -76.11	<0.0001	****
3	180.205	22.8094	7	299.338	33.7825	9	-119.1	-164.7 to -73.61	<0.0001	****
10	143.203	41.046	7	246.825	32.8508	9	-103.6	-166.9 to -40.31	0.0014	**
30	172.95	29.6622	7	204.972	36.9157	9	-32.02	-85.35 to 21.31	0.4642	ns
100	241.85	63.0208	7	284.014	59.9521	9	-42.16	-143.5 to 59.17	0.83	ns
ANOVA table	SS	DF	MS	F (DFn, DFd)		P value
Intensity x Genotype	40704	7	5815	F (7, 98) = 4.393		P=0.0003
Intensity	702147	7	100307	F (2.346, 32.85) = 75.78		P<0.0001
Genotype	226735	1	226735	F (1, 14) = 72.10		P<0.0001
Subject	44023	14	3145	F (14, 98) = 2.376		P=0.0069
Residual	129719	98	1324
Extended Figure 2-6: Table related to Figure 2D: amplitude 150 ms post flash (μV)
cd.s/m2	Rod-Control			Rod-HCN1 KO			Rod-Control - Rod-HCN1 KO		adj p	significant
	mean	st dev	N	mean	st dev	N	mean	95% CI
0.003	138.832	48.861	7	227.85	56.1208	9	-89.02	-173.4 to -4.590	0.0357	*
0.01	151.835	43.5712	7	303.418	40.0107	9	-151.6	-220.9 to -82.24	<0.0001	****
0.1	83.8619	22.007	7	171.84	31.2069	9	-87.98	-130.7 to -45.28	<0.0001	****
1	74.8842	44.2431	7	189.398	22.0115	9	-114.5	-180.6 to -48.44	0.0016	**
3	94.6636	18.8241	7	204.175	21.8962	9	-109.5	-142.2 to -76.79	<0.0001	****
10	58.8783	40.0207	7	178.658	25.4967	9	-119.8	-179.9 to -59.67	0.0004	***
30	100.936	29.0466	7	158.426	33.7863	9	-57.49	-108.0 to -7.004	0.021	*
100	167.287	80.352	7	219.111	63.9074	9	-51.82	-175.6 to 71.98	0.8133	ns
ANOVA table	SS	DF	MS	F (DFn, DFd)		P value
Intensity x Genotype	30336	7	4334	F (7, 98) = 2.822		P=0.0101
Intensity	168854	7	24122	F (2.217, 31.04) = 15.71		P<0.0001
Genotype	300753	1	300753	F (1, 14) = 91.67		P<0.0001
Subject	45930	14	3281	F (14, 98) = 2.136		P=0.0158
Residual	150484	98	1536
Extended Figure 2-7: Table related to Figure 2D: amplitude 200 ms post flash (μV)
cd.s/m2	Rod-Control			Rod-HCN1 KO			Rod-Control - Rod-HCN1 KO		adj p	significant
	mean	st dev	N	mean	st dev	N	mean	95% CI
0.003	25.8936	23.2522	7	31.6021	26.1939	9	-5.709	-45.54 to 34.12	0.9998	ns
0.01	82.2578	27.0181	7	61.9536	46.0922	9	20.3	-39.39 to 80.00	0.936	ns
0.1	22.4111	23.7358	7	87.5973	18.1488	9	-65.19	-101.5 to -28.85	0.0007	***
1	34.6033	29.2558	7	114.427	21.496	9	-79.82	-124.4 to -35.29	0.0007	***
3	75.4638	14.7488	7	148.917	10.5564	9	-73.45	-95.83 to -51.07	<0.0001	****
10	52.3587	22.8127	7	133.74	18.024	9	-81.38	-116.5 to -46.27	<0.0001	****
30	93.29	23.2877	7	121.371	29.2876	9	-28.08	-70.19 to 14.02	0.3412	ns
100	117.496	71.7496	7	180.671	59.2861	9	-63.17	-174.5 to 48.18	0.5088	ns
ANOVA table	SS	DF	MS	F (DFn, DFd)		P value
Intensity x Genotype	39943	7	5706	F (7, 98) = 5.215		P<0.0001
Intensity	153274	7	21896	F (2.381, 33.33) = 20.01		P<0.0001
Genotype	69771	1	69771	F (1, 14) = 66.13		P<0.0001
Subject	14771	14	1055	F (14, 98) = 0.9643		P=0.4950
Residual	107226	98	1094
Extended Figure 3-1: Table related to Figure 3B: amplitude (μV)
Hz	Rod-Control			Rod-HCN1 KO			Rod-Control - Rod HCN1 KO		adj p	significant
	mean	st dev	N	mean	st dev	N	mean	95% CI
0.5	73.947	15.0355	5	125.283	18.1746	6	-51.34	-89.32 to -13.36	0.0074	**
0.75	99.2937	26.4996	5	140.392	15.3124	6	-41.1	-100.1 to 17.95	0.2278	ns
1	96.682	25.9793	5	144.933	12.5127	6	-48.25	-107.4 to 10.93	0.1182	ns
1.5	108.242	24.0735	5	141.836	15.2751	6	-33.59	-86.85 to 19.66	0.3287	ns
2	114.505	37.0304	5	167.644	12.6827	6	-53.14	-141.7 to 35.39	0.3035	ns
3	104.223	36.27	5	153.978	13.0891	6	-49.75	-135.9 to 36.35	0.3425	ns
6	98.7413	29.9821	5	126.45	10.1314	6	-27.71	-99.51 to 44.09	0.7467	ns
9	61.102	19.3485	5	86.5144	5.56444	6	-25.41	-72.66 to 21.84	0.3897	ns
12	33.944	7.83224	5	46.4472	2.04449	6	-12.5	-31.82 to 6.818	0.2291	ns
18	6.42514	1.70921	5	7.39788	1.66225	6	-0.9727	-4.915 to 2.969	0.9959	ns
24	4.38066	1.22873	5	2.54478	1.12545	6	1.836	-0.9534 to 4.625	0.3274	ns
30	3.52288	0.894843	5	3.00678	1.00645	6	0.5161	-1.664 to 2.696	0.9974	ns
ANOVA table	SS	DF	MS	F (DFn, DFd)		P value
Frequency x Genotype	13476	11	1225	F (11, 99) = 7.710		P<0.0001
Frequency	344288	11	31299	F (1.776, 15.98) = 197.0		P<0.0001
Genotype	26492	1	26492	F (1, 9) = 14.67		P=0.0040
Subject	16256	9	1806	F (9, 99) = 11.37		P<0.0001
Residual	15730	99	158.9
Extended Figure 3-2: Table related to Figure 3D: amplitude (μV)
Hz	Rod-Control			Rod-HCN1 KO			Rod-Control - Rod HCN1 KO		adj p	significant
	mean	st dev	N	mean	st dev	N	mean	95% CI
0.5	142.81	46.7715	5	153.433	31.445	6	-10.62	-113.8 to 92.59	>0.9999	ns
0.75	159.919	51.6129	5	116.908	9.1763	6	43.01	-88.04 to 174.1	0.8272	ns
1	147.517	45.576	5	113.153	11.4556	6	34.36	-78.48 to 147.2	0.8913	ns
1.5	135.409	40.9504	5	142.358	11.1724	6	-6.949	-107.5 to 93.62	>0.9999	ns
2	108.847	34.237	5	126.6	9.60151	6	-17.75	-101.6 to 66.09	0.9898	ns
3	82.5727	27.6249	5	120.064	13.527	6	-37.49	-100.3 to 25.30	0.3476	ns
6	65.866	17.5077	5	114.822	13.9524	6	-48.96	-87.80 to -10.11	0.0135	*
9	48.8127	17.1181	5	105.397	13.7562	6	-56.58	-94.60 to -18.57	0.0047	**
12	38.2733	10.8931	5	48.9039	5.4702	6	-10.63	-35.31 to 14.05	0.7077	ns
18	14.9744	2.4347	5	11.7214	1.12702	6	3.253	-2.325 to 8.831	0.3633	ns
24	5.7008	2.31691	5	4.55655	1.30005	6	1.144	-4.034 to 6.323	0.9956	ns
30	3.6308	1.02484	5	2.93628	1.06837	6	0.6945	-1.725 to 3.114	0.9865	ns
ANOVA table	SS	DF	MS	F (DFn, DFd)		P value
Frequency x Genotype	26430	11	2403	F (11, 99) = 8.790		P<0.0001
Frequency	361279	11	32844	F (2.029, 18.26) = 120.2		P<0.0001
Genotype	2579	1	2579	F (1, 9) = 0.8250		P=0.3874
Subject	28134	9	3126	F (9, 99) = 11.44		P<0.0001
Residual	27062	99	273.4
Extended Figure 4-1: Table related to Figure 4A: amplitude of fundamental (μV)
Hz	Rod-Control			Rod-HCN1 KO			Rod-Control - Rod HCN1 KO		adj p	significant
	mean	st dev	N	mean	st dev	N	mean	95% CI
0.5	10.2799	2.62398	5	21.2959	2.84137	6	-11.02	-17.30 to -4.728	0.0012	**
0.75	13.5029	3.51162	5	24.9197	2.35426	6	-11.42	-19.17 to -3.667	0.006	**
1	17.4247	4.55624	5	27.3462	2.52396	6	-9.921	-20.12 to 0.2764	0.0568	ns
1.5	22.3745	6.05692	5	31.9907	3.44699	6	-9.616	-23.13 to 3.902	0.2094	ns
2	24.3368	8.2494	5	35.4321	2.76824	6	-11.1	-30.87 to 8.679	0.363	ns
3	23.751	8.75089	5	33.8781	3.03431	6	-10.13	-31.01 to 10.76	0.5164	ns
6	19.5677	6.51107	5	26.3433	2.15324	6	-6.776	-22.41 to 8.861	0.6297	ns
9	13.1065	4.19597	5	17.0088	0.825352	6	-3.902	-14.49 to 6.688	0.7388	ns
12	6.79644	2.40244	5	9.19977	0.430807	6	-2.403	-8.501 to 3.694	0.6708	ns
18	1.15688	0.500406	5	1.26727	0.149257	6	-0.1104	-1.327 to 1.107	>0.9999	ns
24	0.4469	0.165675	5	0.250817	0.024748	6	0.1961	-0.2281 to 0.6202	0.5026	ns
30	0.24066	0.103573	5	0.327867	0.0426998	6	-0.08721	-0.3285 to 0.1541	0.829	ns
ANOVA table	SS	DF	MS	F (DFn, DFd)	P value
Frequency x Genotype	682.9	11	62.08	F (11, 99) = 8.960	P<0.0001
Frequency	14804	11	1346	F (1.483, 13.35) = 194.2	P<0.0001
Genotype	1322	1	1322	F (1, 9) = 16.20	P=0.0030
Subject	734.8	9	81.64	F (9, 99) = 11.78	P<0.0001
Residual	686	99	6.929
Extended Figure 4-2: Table related to Figure 4B: amplitude of fundamental (μV)
Hz	Rod-Control			Rod-HCN1 KO			Rod-Control - Rod HCN1 KO		adj p	significant
	mean	st dev	N	mean	st dev	N	mean	95% CI
0.5	27.208	10.1845	5	27.7913	4.98387	6	-0.5832	-23.73 to 22.57	>0.9999	ns
0.75	26.1921	9.25638	5	15.5412	1.79648	6	10.65	-12.73 to 34.03	0.5289	ns
1	28.4833	9.41544	5	14.292	2.04526	6	14.19	-9.409 to 37.79	0.2762	ns
1.5	25.0064	9.66298	5	25.814	3.34298	6	-0.8076	-23.88 to 22.26	>0.9999	ns
2	20.8626	8.14454	5	24.5	2.43485	6	-3.637	-23.44 to 16.16	0.997	ns
3	16.9375	5.752	5	25.0607	2.82847	6	-8.123	-21.19 to 4.944	0.3092	ns
6	14.8685	6.16289	5	23.9661	2.41265	6	-9.098	-23.56 to 5.366	0.2751	ns
9	10.5322	3.83514	5	21.3979	2.44998	6	-10.87	-19.35 to -2.385	0.0137	*
12	8.11468	2.74283	5	9.78598	1.15214	6	-1.671	-8.043 to 4.701	0.9719	ns
18	3.02474	1.01257	5	2.24868	0.421576	6	0.7761	-1.579 to 3.131	0.8905	ns
24	1.01788	0.365077	5	0.66725	0.090775	6	0.3506	-0.5542 to 1.255	0.7092	ns
30	0.29254	0.169276	5	0.2985	0.060068	6	-0.00596	-0.4087 to 0.3968	>0.9999	ns
ANOVA table	SS	DF	MS	F (DFn, DFd)	P value
Frequency x Genotype	1617	11	147	F (11, 99) = 14.03	P<0.0001
Frequency	11535	11	1049	F (1.988, 17.89) = 100.1	P<0.0001
Genotype	17.69	1	17.69	F (1, 9) = 0.1102	P=0.7475
Subject	1445	9	160.6	F (9, 99) = 15.32	P<0.0001
Residual	1037	99	10.48
Extended Figure 4-3: Table related to Figure 4D: amplitude of recovery following b-wave-like component (μV)
Hz	Rod-Control			Rod-HCN1 KO			Rod-Control - Rod HCN1 KO		adj p	significant
	log mean	SEM	N	log mean	SEM	N	mean	t
0.5	2.122	0.0638	5	1.386	0.0582	6	0.736	8.521	<0.001	****
0.75	2.161	0.0638	5	1.371	0.0582	6	0.79	9.146	<0.001	****
1	2.153	0.0638	5	1.534	0.0582	6	0.619	7.161	<0.001	****
ANOVA table	SS	DF	MS	F	P
Genotype x T Freq	0.042	2	0.021	1.031	0.37
T Freq	0.0515	2	0.0258	1.265	0.298
Genotype	4.183	1	4.183	205.487	<0.001
Residual	0.55	27	0.0204
Total	4.835	32	0.151
Extended Figure 4-4: Table related to Figure 4E: rate of recovery following b-wave-like component (μV/ms)
Hz	Rod-Control			Rod-HCN1 KO			Rod-Control - Rod HCN1 KO		adj p	significant
	mean rate	SEM	N	mean rate	SEM	N	mean	t
0.5	-0.525	0.0657	5	-0.833	0.06	6	0.308	3.463	0.002	***
0.75	-0.446	0.0657	5	-0.986	0.06	6	0.54	6.075	<0.001	****
1	-0.407	0.0657	5	-0.8	0.06	6	0.393	4.422	<0.001	****
ANOVA table	SS	DF	MS	F	P
Genotype x T Freq	2	0.0753	0.0377	1.746	0.194
T Freq	2	0.0711	0.0356	1.649	0.211
Genotype	1	1.401	1.401	64.957	<0.001
Residual	27	0.582	0.0216
Total	32	2.137	0.0668
Extended Figure 5-1: Table related to Figure 5B: amplitude (μV)
Hz	Rod-Control			Rod-HCN1 KO			Rod-Control - Rod HCN1 KO		adj p	significant
	mean	st dev	N	mean	st dev	N	mean	95% CI
0.5	107.512	44.6723	5	116.054	51.6437	7	-8.542	-112.7 to 95.65	>0.9999	ns
0.75	83.886	40.3998	5	64.9414	20.4443	7	18.94	-73.22 to 111.1	0.9965	ns
1	77.347	29.6695	5	54.0271	19.6371	7	23.32	-42.09 to 88.73	0.8967	ns
1.5	88.0283	28.3828	5	23.5155	10.2463	7	64.51	-3.503 to 132.5	0.0618	ns
2	73.636	27.5635	5	34.1886	15.8532	7	39.45	-22.30 to 101.2	0.2949	ns
3	69.95	25.063	5	34.1262	12.6788	7	35.82	-21.36 to 93.00	0.2973	ns
6	55.6553	23.6734	5	33.7113	15.305	7	21.94	-30.36 to 74.25	0.7721	ns
9	48.0367	18.9939	5	22.5661	10.8848	7	25.47	-17.10 to 68.04	0.3588	ns
12	42.948	17.8604	5	8.76994	1.86296	7	34.18	-12.10 to 80.46	0.1412	ns
18	23.2518	8.6072	5	7.35126	1.8633	7	15.9	-5.795 to 37.60	0.1496	ns
24	14.5987	5.74896	5	4.7948	1.11847	7	9.804	-4.782 to 24.39	0.1951	ns
30	9.83034	2.65333	5	1.35616	1.27774	7	8.474	2.376 to 14.57	0.011	*
ANOVA table	SS	DF	MS	F (DFn, DFd)		P value
Frequency x Genotype	10858	11	987.1	F (11, 110) = 3.609		P=0.0002
Frequency	118200	11	10745	F (1.767, 17.67) = 39.29		P<0.0001
Genotype	20339	1	20339	F (1, 10) = 7.202		P=0.0229
Subject	28242	10	2824	F (10, 110) = 10.33		P<0.0001
Residual	30083	110	273.5
Extended Figure 5-2: Table related to Figure 5D: amplitude (μV)
Hz	Rod-Control			Rod-HCN1 KO			Rod-Control - Rod HCN1 KO		adj p	significant
	mean	st dev	N	mean	st dev	N	mean	95% CI
0.5	49.869	19.2576	5	60.2985	30.4024	7	-10.43	-63.33 to 42.48	0.9996	ns
0.75	61.08	23.7696	5	30.7099	18.934	7	30.37	-21.61 to 82.35	0.4429	ns
1	54.037	28.1904	5	33.4979	11.5666	7	20.54	-45.82 to 86.90	0.9137	ns
1.5	78.171	32.6959	5	36.8117	15.0477	7	41.36	-34.30 to 117.0	0.4191	ns
2	82.274	35.2569	5	38.2257	12.2774	7	44.05	-40.84 to 128.9	0.4366	ns
3	73.3813	35.196	5	33.0838	10.0846	7	40.3	-46.36 to 127.0	0.5305	ns
6	64.4367	26.3017	5	24.8246	10.8062	7	39.61	-22.29 to 101.5	0.2591	ns
9	52.4927	19.1084	5	14.8746	10.386	7	37.62	-5.522 to 80.76	0.0909	ns
12	49.9273	23.5998	5	11.078	6.09631	7	38.85	-19.83 to 97.53	0.2109	ns
18	29.0433	9.45528	5	7.4122	1.45706	7	21.63	-2.618 to 45.88	0.0754	ns
24	19.2546	4.72352	5	4.34341	2.26317	7	14.91	4.046 to 25.78	0.0117	*
30	8.5725	3.21228	5	1.3592	1.39176	7	7.213	-0.2882 to 14.71	0.0589	ns
ANOVA table	SS	DF	MS	F (DFn, DFd)		P value
Frequency x Genotype	9059	11	823.6	F (11, 110) = 5.803		P<0.0001
Frequency	44111	11	4010	F (2.879, 28.79) = 28.25		P<0.0001
Genotype	25834	1	25834	F (1, 10) = 10.15		P=0.0097
Subject	25455	10	2546	F (10, 110) = 17.94		P<0.0001
Residual	15612	110	141.9
Extended Figure 6-1: Table related to Figure 6A: amplitude of fundamental (μV)
Hz	Rod-Control			Rod-HCN1 KO			Rod-Control - Rod HCN1 KO		adj p	significant
	mean	st dev	N	mean	st dev	N	mean	95% CI
0.5	14.3108	6.48198	5	27.0385	12.9473	7	-12.73	-34.12 to 8.669	0.4684	ns
0.75	13.2923	6.28503	5	15.8979	7.07818	7	-2.606	-17.13 to 11.92	0.9998	ns
1	15.2244	6.8739	5	8.88869	2.94576	7	6.336	-9.743 to 22.41	0.752	ns
1.5	18.1842	6.68849	5	2.99089	1.38823	7	15.19	-1.712 to 32.10	0.0739	ns
2	14.993	6.45027	5	3.96049	2.07394	7	11.03	-4.650 to 26.71	0.1803	ns
3	15.0562	5.41232	5	5.15599	2.91827	7	9.9	-2.333 to 22.13	0.1231	ns
6	12.1723	4.84408	5	6.0765	3.18571	7	6.096	-4.590 to 16.78	0.4346	ns
9	10.6281	4.67277	5	4.83556	2.69397	7	5.793	-4.672 to 16.26	0.4437	ns
12	8.73336	3.95809	5	1.14939	0.795003	7	7.584	-2.440 to 17.61	0.134	ns
18	4.37438	1.59396	5	1.24716	0.241866	7	3.127	-0.9630 to 7.217	0.1275	ns
24	2.61104	1.03547	5	0.589614	0.184144	7	2.021	-0.6180 to 4.661	0.1277	ns
30	1.22312	0.567171	5	0.1873	0.0799875	7	1.036	-0.4232 to 2.495	0.1614	ns
ANOVA table	SS	DF	MS	F (DFn, DFd)	P value
Frequency x Genotype	1664	11	151.3	F (11, 110) = 10.97	P<0.0001
Frequency	4198	11	381.6	F (1.779, 17.79) = 27.67	P<0.0001
Genotype	677.2	1	677.2	F (1, 10) = 5.307	P=0.0440
Subject	1276	10	127.6	F (10, 110) = 9.252	P<0.0001
Residual	1517	110	13.79
Extended Figure 6-2: Table related to Figure 6B: amplitude of fundamental (μV)
Hz	Rod-Control			Rod-HCN1 KO			Rod-Control - Rod HCN1 KO		adj p	significant
	mean	st dev	N	mean	st dev	N	mean	95% CI
0.5	5.4167	3.04103	5	12.5682	6.54146	7	-7.152	-17.87 to 3.569	0.3243	ns
0.75	9.18672	5.01285	5	5.13744	3.34354	7	4.049	-6.994 to 15.09	0.8815	ns
1	10.2566	6.16735	5	4.69353	1.98178	7	5.563	-9.433 to 20.56	0.7667	ns
1.5	15.5674	6.12497	5	4.36596	3.76033	7	11.2	-2.408 to 24.81	0.1192	ns
2	16.1602	7.30605	5	5.37259	2.49271	7	10.79	-6.848 to 28.42	0.2818	ns
3	14.7158	7.28258	5	5.25871	1.82987	7	9.457	-8.694 to 27.61	0.4051	ns
6	12.7354	5.00241	5	4.21834	2.77651	7	8.517	-2.743 to 19.78	0.1615	ns
9	11.3555	4.79633	5	2.62121	2.47852	7	8.734	-2.174 to 19.64	0.127	ns
12	9.61028	4.10868	5	1.83743	1.61557	7	7.773	-1.958 to 17.50	0.1204	ns
18	5.1371	1.77287	5	0.937257	0.340464	7	4.2	-0.3014 to 8.701	0.0645	ns
24	2.59168	1.12402	5	0.500914	0.274005	7	2.091	-0.7177 to 4.899	0.1437	ns
30	0.8493	0.454445	5	0.167	0.0788213	7	0.6823	-0.4775 to 1.842	0.2846	ns
ANOVA table	SS	DF	MS	F (DFn, DFd)	P value
Frequency x Genotype	873.7	11	79.43	F (11, 110) = 12.60	P<0.0001
Frequency	1477	11	134.3	F (3.287, 32.87) = 21.31	P<0.0001
Genotype	1056	1	1056	F (1, 10) = 10.15	P=0.0097
Subject	1040	10	104	F (10, 110) = 16.50	P<0.0001
Residual	693.2	110	6.302
Extended Figure 7-1: Table related to Figure 7B: amplitude (μV)
Hz	Rod-Control			Rod-HCN1 KO			Rod-Control - Rod-HCN1 KO		adj p	significant
	mean	st dev	N	mean	st dev	N	mean	95% CI
0.5	477.562	66.5582	4	458.583	50.2666	6	18.98	-168.8 to 206.7	>0.9999	ns
1	320.762	41.2862	4	135.637	29.2669	6	185.1	67.08 to 303.2	0.0067	**
2	169.135	19.5547	4	31.8335	29.6192	6	137.3	75.92 to 198.7	0.0003	***
3	152.143	31.267	4	13.6899	3.23312	6	138.5	17.02 to 259.9	0.0343	*
5	157.711	20.5344	4	21.8816	9.52154	6	135.8	69.81 to 201.8	0.0035	**
7	147.336	17.8076	4	14.994	5.84332	6	132.3	70.12 to 194.6	0.0041	**
10	120.206	11.0658	4	11.7172	4.01854	6	108.5	70.64 to 146.3	0.0014	**
12	113.791	9.44732	4	14.3202	3.13887	6	99.47	66.54 to 132.4	0.0012	**
15	94.705	15.1357	4	17.4885	13.19	6	77.22	35.39 to 119.0	0.0022	**
18	73.8525	13.2082	4	11.1346	5.30719	6	62.72	18.62 to 106.8	0.015	*
20	61.8113	8.7829	4	9.63275	3.54735	6	52.18	22.89 to 81.47	0.0067	**
30	48.9147	14.3786	4	6.46267	1.00928	6	42.45	-13.80 to 98.71	0.1089	ns
ANOVA table	SS	DF	MS	F (DFn, DFd)		P value
Frequency x Genotype	63800	11	5800	F (11, 88) = 12.51		P<0.0001
Frequency	1612931	11	146630	F (1.731, 13.85) = 316.2		P<0.0001
Genotype	283484	1	283484	F (1, 8) = 232.0		P<0.0001
Subject	9774	8	1222	F (8, 88) = 2.634		P=0.0123
Residual	40812	88	463.8
Extended Figure 8-1: Table related to Figure 8B: a-wave amplitude (μV)
cd.s/m2	Rod-Control			Rod-HCN1 KO			Rod-Control - Rod-HCN1 KO		adj p	significant
	mean	st dev	N	mean	st dev	N	mean	95% CI
0.23	2.15563	5.30482	8	8.89105	9.24654	11	-6.735	-17.24 to 3.768	0.4002	ns
1	6.99712	4.94454	8	5.10036	4.7781	11	1.897	-5.282 to 9.075	0.9864	ns
2.4	10.3508	6.40469	8	8.64118	5.14348	11	1.71	-7.185 to 10.60	0.9981	ns
7.6	13.0886	1.80746	8	12.198	4.56302	11	0.8906	-3.976 to 5.757	0.9988	ns
24	16.6619	3.57736	8	16.1976	7.74497	11	0.4642	-7.954 to 8.882	>0.9999	ns
77	22.6156	4.88521	8	17.8031	5.1997	11	4.812	-2.515 to 12.14	0.3691	ns
246	22.2381	4.57862	8	19.3023	3.52987	11	2.936	-3.378 to 9.250	0.738	ns
724	22.9256	4.84294	8	24.3009	5.73844	11	-1.375	-8.971 to 6.220	0.999	ns
ANOVA table	SS	DF	MS	F (DFn, DFd)		P value
Intensity x Genotype	388.7	7	55.53	F (7, 119) = 2.046		P=0.0548
Intensity	6280	7	897.1	F (3.589, 61.01) = 33.05		P<0.0001
Genotype	12.24	1	12.24	F (1, 17) = 0.2324		P=0.6359
Subject	895.6	17	52.68	F (17, 119) = 1.941		P=0.0206
Residual	3230	119	27.14
Extended Figure 8-2: Table related to Figure 8C: b-wave amplitude (μV)
cd.s/m2	Rod-Control			Rod-HCN1 KO			Rod-Control - Rod-HCN1 KO		adj p	significant
	mean	st dev	N	mean	st dev	N	mean	95% CI
0.23	16.9494	7.85193	8	10.4876	9.05717	11	6.462	-5.706 to 18.63	0.6273	ns
1	40.5069	23.458	8	13.835	8.27308	11	26.67	-4.694 to 58.04	0.1104	ns
2.4	67.2131	15.0234	8	16.8096	13.4609	11	50.4	29.04 to 71.76	<0.0001	****
7.6	144.751	28.6742	8	24.4917	14.1761	11	120.3	81.97 to 158.5	<0.0001	****
24	160.738	31.7789	8	25.5141	7.54574	11	135.2	92.48 to 178.0	<0.0001	****
77	164.338	30.3187	8	30.27	16.3318	11	134.1	93.51 to 174.6	<0.0001	****
246	183.387	30.8277	8	23.898	14.9596	11	159.5	118.3 to 200.6	<0.0001	****
724	191.981	33.965	8	27.7473	10.7166	11	164.2	118.7 to 209.7	<0.0001	****
ANOVA table	SS	DF	MS	F (DFn, DFd)		P value
Intensity x Genotype	125338	7	17905	F (7, 119) = 125.3		P<0.0001
Intensity	184966	7	26424	F (3.189, 54.22) = 184.9		P<0.0001
Genotype	367578	1	367578	F (1, 17) = 179.6		P<0.0001
Subject	34795	17	2047	F (17, 119) = 14.32		P<0.0001
Residual	17005	119	142.9
Extended Figure 9: Table related to Figure 9A: OMR contrast sensitivity (0.002 cd/m2)
Temporal Frequency (Hz)	Rod-Control			Rod-HCN1 KO			Rod-Control - Rod-HCN1 KO		adj p	significant
	log mean	st dev	N	log mean	st dev	N	mean	t
1.488	0.6558	0.137373	6	0.557817	0.164723	6	0.098	1.07	0.293	ns
0.372	0.8052	0.161448	6	0.76545	0.103717	6	0.0398	0.434	0.667	ns
0.124	0.600167	0.241986	6	0.595767	0.0978898	6	0.00437	0.0477	0.962	ns
ANOVA table	SS	DF	MS	F	P value
Intensity x frequency	2	0.0134	0.0067	0.266	0.768
Frequency	2	0.268	0.134	5.329	0.01
Genotype	1	0.0202	0.0202	0.803	0.377
Residual	30	0.755	0.0252
Total	35	1.057	0.0302
Extended Figure 9-2: Table related to Figure 9B: OMR contrast sensitivity (70 cd/m2)
Temporal Frequency (Hz)	Rod-Control			Rod-HCN1 KO			Rod-Control - Rod-HCN1 KO		adj p	significant
	log mean	st dev	N	log mean	st dev	N	mean	t
1.488	0.624667	0.0497541	6	0.733483	0.182916	6	0.109	1.546	0.133	ns
0.372	0.833767	0.138716	6	0.78875	0.113055	6	0.045	0.64	0.527	ns
0.124	0.698217	0.089763	6	0.48485	0.114809	6	0.213	3.03	0.005	**
ANOVA table	SS	DF	MS	F	P value
Intensity x frequency	2	0.156	0.0779	5.239	0.011
Frequency	2	0.294	0.147	9.876	<0.001
Genotype	1	0.0224	0.0224	1.504	0.23
Residual	30	0.446	0.0149
Total	35	0.918	0.0262
Extended Figure 11-1: Table related to Figure 11E: Pearson's Correlation
	Cone-Control			Cone-HCN1 KO			t-test
	mean	st dev	N	mean	st dev	N	p	significant
	0.1095	0.01471	4	-0.06743	0.07698	4	0.004	**
Extended Figure 12-1: Table related to Figure 12B: a-wave amplitude (μV)
cd.s/m2	Cone-Control			Cone-HCN1 KO			Cone-Control - Cone HCN1 KO		adj p	significant
	mean	st dev	N	mean	st dev	N	mean	95% CI
0.003	1.42781	2.40296	8	0.466111	5.92251	9	0.9617	-6.282 to 8.206	0.9998	ns
0.01	17.3523	8.03662	8	19.8863	6.62236	9	-2.534	-14.11 to 9.039	0.9956	ns
0.1	113.834	22.815	8	118.769	16.9134	9	-4.935	-36.95 to 27.08	0.9996	ns
1	232.256	28.1443	8	221.528	35.0023	9	10.73	-37.89 to 59.34	0.9958	ns
3	214.287	37.0013	8	201.394	47.2369	9	12.89	-52.06 to 77.85	0.9979	ns
10	233.631	29.1098	8	220.228	45.8541	9	13.4	-45.84 to 72.65	0.9946	ns
30	234.025	28.2813	8	223.267	49.0687	9	10.76	-51.43 to 72.95	0.9991	ns
100	277.938	29.3938	8	268.2	56.6909	9	9.737	-61.00 to 80.48	0.9998	ns
ANOVA table	SS	DF	MS	F (DFn, DFd)		P value
Intensity x Genotype	1601	7	228.7	F (7, 105) = 0.4881		P=0.8414
Intensity	1285654	7	183665	F (1.351, 20.27) = 392.0		P<0.0001
Genotype	1378	1	1378	F (1, 15) = 0.2583		P=0.6187
Subject	80016	15	5334	F (15, 105) = 11.39		P<0.0001
Residual	49193	105	468.5
Extended Figure 12-2: Table related to Figure 12B: b-wave amplitude (μV)
cd.s/m2	Cone-Control			Cone-HCN1 KO			Cone-Control - Cone HCN1 KO		adj p	significant
	mean	st dev	N	mean	st dev	N	mean	95% CI
0.003	239.944	60.9299	8	224.806	38.125	9	15.14	-68.02 to 98.30	0.9985	ns
0.01	309.906	75.4932	8	276.222	27.7945	9	33.68	-67.17 to 134.5	0.9146	ns
0.1	376.425	78.3936	8	353.461	46.7514	9	22.96	-83.47 to 129.4	0.9951	ns
1	524.706	108.322	8	483.711	82.3526	9	41	-111.8 to 193.8	0.9832	ns
3	561.575	111.608	8	503.033	99.4991	9	58.54	-106.2 to 223.2	0.9236	ns
10	568.106	109.622	8	505.844	117.618	9	62.26	-112.4 to 236.9	0.9249	ns
30	518.356	109.605	8	435.7	123.236	9	82.66	-96.15 to 261.5	0.7612	ns
100	640.475	113.816	8	575.617	136.958	9	64.86	-127.9 to 257.6	0.9446	ns
ANOVA table	SS	DF	MS	F (DFn, DFd)		P value
Intensity x Genotype	15922	7	2275	F (7, 105) = 1.043		P=0.4062
Intensity	2064871	7	294982	F (1.726, 25.89) = 135.2		P<0.0001
Genotype	76890	1	76890	F (1, 15) = 1.343		P=0.2647
Subject	859019	15	57268	F (15, 105) = 26.25		P<0.0001
Residual	229079	105	2182
Extended Figure 12-3: Table related to Figure 12C: a-wave time to peak (ms)
cd.s/m2	Cone-Control			Cone-HCN1 KO			Cone-Control - Cone HCN1 KO		adj p	significant
	mean	st dev	N	mean	st dev	N	mean	95% CI
0.003	21.625	4.21096	8	22.7778	5.28773	9	-1.153	-8.470 to 6.164	0.9996	ns
0.01	22.625	1.05221	8	22.6944	1.48312	9	-0.06944	-2.042 to 1.903	>0.9999	ns
0.1	18.5625	1.00667	8	18.4444	1.05902	9	0.1181	-1.471 to 1.707	>0.9999	ns
1	15.6875	1.05855	8	15.4444	1.04416	9	0.2431	-1.380 to 1.866	0.9997	ns
3	11.1562	2.82823	8	10.1667	1.1726	9	0.9896	-2.789 to 4.768	0.9783	ns
10	8.65625	0.94432	8	8.33333	0.661438	9	0.3229	-0.9876 to 1.633	0.9896	ns
30	7.40625	0.789863	8	7.16667	0.414578	9	0.2396	-0.8226 to 1.302	0.9927	ns
100	6.125	0.377964	8	5.80556	0.300463	9	0.3194	-0.2196 to 0.8585	0.4751	ns
ANOVA table	SS	DF	MS	F (DFn, DFd)		P value
Intensity x Genotype	10.68	7	1.526	F (7, 105) = 0.4751		P=0.8507
Intensity	5354	7	764.8	F (1.382, 20.73) = 238.1		P<0.0001
Genotype	0.5405	1	0.5405	F (1, 15) = 0.05308		P=0.8209
Subject	152.7	15	10.18	F (15, 105) = 3.171		P=0.0003
Residual	337.2	105	3.212
Extended Figure 12-4: Table related to Figure 12C: b-wave time to peak (ms)
cd.s/m2	Cone-Control			Cone-HCN1 KO			Cone-Control - Cone HCN1 KO		adj p	significant
	mean	st dev	N	mean	st dev	N	mean	95% CI
0.003	60.125	2.79349	8	56.6389	7.1503	9	3.486	-5.245 to 12.22	0.8399	ns
0.01	41.5938	3.79364	8	39.1389	2.83425	9	2.455	-2.877 to 7.787	0.7489	ns
0.1	29.125	1.9133	8	28.7222	1.83475	9	0.4028	-2.497 to 3.303	0.9998	ns
1	27.1875	1.58537	8	26.7778	1.81764	9	0.4097	-2.204 to 3.023	0.9996	ns
3	26.0625	2.67178	8	25.8056	1.96762	9	0.2569	-3.487 to 4.001	>0.9999	ns
10	27.5	1.89925	8	27.4722	1.83901	9	0.02778	-2.862 to 2.918	>0.9999	ns
30	28.5938	2.03073	8	28.9444	2.42635	9	-0.3507	-3.776 to 3.075	>0.9999	ns
100	26.3438	1.52326	8	26.3333	1.48955	9	0.01042	-2.317 to 2.338	>0.9999	ns
ANOVA table	SS	DF	MS	F (DFn, DFd)		P value
Intensity x Genotype	55.45	7	7.921	F (7, 105) = 1.527		P=0.1662
Intensity	15143	7	2163	F (1.303, 19.55) = 417.0		P<0.0001
Genotype	23.75	1	23.75	F (1, 15) = 0.8408		P=0.3737
Subject	423.7	15	28.25	F (15, 105) = 5.445		P<0.0001
Residual	544.7	105	5.188
Extended Figure 12-5: Table related to Figure 12D: amplitude 100 ms post flash (μV)
cd.s/m2	Cone-Control			Cone-HCN1 KO			Cone-Control - Cone HCN1 KO		adj p	significant
	mean	st dev	N	mean	st dev	N	mean	95% CI
0.003	284.589	77.7367	8	294.381	53.1061	9	-9.792	-117.2 to 97.63	>0.9999	ns
0.01	282.016	78.9402	8	273.52	32.5404	9	8.495	-96.97 to 114.0	>0.9999	ns
0.1	141.273	53.6645	8	156.519	50.9967	9	-15.25	-96.30 to 65.81	0.9986	ns
1	141.336	52.886	8	157.11	48.0118	9	-15.77	-94.31 to 62.76	0.9977	ns
3	136.527	45.7534	8	137.036	24.7844	9	-0.5093	-62.15 to 61.13	>0.9999	ns
10	132.367	48.2278	8	144.867	27.2696	9	-12.5	-77.67 to 52.67	0.9977	ns
30	121.022	60.8772	8	110.932	24.8117	9	10.09	-71.24 to 91.42	0.9999	ns
100	192.059	66.0015	8	198.901	65.8597	9	-6.842	-108.5 to 94.86	>0.9999	ns
ANOVA table	SS	DF	MS	F (DFn, DFd)		P value
Intensity x Genotype	3105	7	443.6	F (7, 105) = 0.4790		P=0.8480
Intensity	531284	7	75898	F (4.364, 65.47) = 81.95		P<0.0001
Genotype	937.3	1	937.3	F (1, 15) = 0.05944		P=0.8107
Subject	236556	15	15770	F (15, 105) = 17.03		P<0.0001
Residual	97241	105	926.1
Extended Figure 12-6: Table related to Figure 12D: amplitude 150 ms post flash (μV)
cd.s/m2	Cone-Control			Cone-HCN1 KO			Cone-Control - Cone HCN1 KO		adj p	significant
	mean	st dev	N	mean	st dev	N	mean	95% CI
0.003	128.095	45.0799	8	136.596	48.9153	9	-8.501	-80.72 to 63.71	>0.9999	ns
0.01	124.517	56.2552	8	132.097	32.2003	9	-7.58	-83.68 to 68.52	>0.9999	ns
0.1	43.5312	26.5613	8	68.2864	46.0675	9	-24.76	-83.14 to 33.63	0.8187	ns
1	50.0537	34.5764	8	63.3231	32.2923	9	-13.27	-65.15 to 38.61	0.9886	ns
3	51.8884	27.679	8	52.5302	22.2512	9	-0.6418	-40.23 to 38.95	>0.9999	ns
10	44.7359	36.9568	8	63.286	29.771	9	-18.55	-71.44 to 34.34	0.9261	ns
30	61.109	50.4368	8	44.3664	21.395	9	16.74	-50.66 to 84.14	0.9844	ns
100	146.374	59.8372	8	157.52	56.8131	9	-11.15	-101.5 to 79.20	>0.9999	ns
ANOVA table	SS	DF	MS	F (DFn, DFd)		P value
Intensity x Genotype	4637	7	662.4	F (7, 105) = 0.7345		P=0.6431
Intensity	225674	7	32239	F (3.364, 50.46) = 35.75		P<0.0001
Genotype	2427	1	2427	F (1, 15) = 0.3431		P=0.5668
Subject	106087	15	7072	F (15, 105) = 7.843		P<0.0001
Residual	94684	105	901.8
Extended Figure 12-7: Table related to Figure 12D: amplitude 200 ms post flash (μV)
cd.s/m2	Cone-Control			Cone-HCN1 KO			Cone-Control - Cone HCN1 KO		adj p	significant
	mean	st dev	N	mean	st dev	N	mean	95% CI
0.003	19.008	26.6508	8	20.7513	20.0085	9	-1.743	-39.24 to 35.75	>0.9999	ns
0.01	50.2617	31.0536	8	59.5884	28.9844	9	-9.327	-55.91 to 37.26	0.9978	ns
0.1	2.72444	7.81155	8	25.1447	36.0985	9	-22.42	-66.26 to 21.42	0.5822	ns
1	15.4148	21.8952	8	25.0243	20.8803	9	-9.609	-42.73 to 23.51	0.9755	ns
3	26.27	19.3512	8	31.8142	18.8087	9	-5.544	-35.04 to 23.95	0.9986	ns
10	27.6018	30.4729	8	40.8307	19.2116	9	-13.23	-54.86 to 28.40	0.9502	ns
30	37.2032	35.7941	8	20.5376	22.4464	9	16.67	-32.20 to 65.53	0.9278	ns
100	108.448	58.4027	8	113.639	34.487	9	-5.191	-84.41 to 74.03	>0.9999	ns
ANOVA table	SS	DF	MS	F (DFn, DFd)		P value
Intensity x Genotype	3718	7	531.2	F (7, 105) = 0.8146		P=0.5772
Intensity	118845	7	16978	F (2.884, 43.26) = 26.03		P<0.0001
Genotype	1345	1	1345	F (1, 15) = 0.6272		P=0.4407
Subject	32162	15	2144	F (15, 105) = 3.288		P=0.0002
Residual	68474	105	652.1
Extended Figure 13-1: Table related to Figure 13B: a-wave amplitude (μV)
cd.s/m2	Cone-Control			Cone-HCN1 KO			Cone-Control - Cone HCN1 KO		adj p	significant
	mean	st dev	N	mean	st dev	N	mean	95% CI
0.23	2.96956	3.02582	9	2.74594	3.35855	9	0.2236	-4.593 to 5.040	>0.9999	ns
1	5.72928	1.77508	9	5.22311	3.4811	9	0.5062	-3.877 to 4.889	>0.9999	ns
2.4	10.9577	3.56209	9	10.9279	4.2241	9	0.02972	-5.873 to 5.933	>0.9999	ns
7.6	14.4688	3.51429	9	13.1669	4.57139	9	1.302	-4.893 to 7.497	0.9983	ns
24	18.4813	3.98129	9	16.8327	3.87982	9	1.649	-4.265 to 7.562	0.9877	ns
77	18.4794	4.28484	9	19.46	4.43677	9	-0.9806	-7.543 to 5.582	0.9999	ns
246	22.6704	6.80321	9	20.2256	4.43526	9	2.445	-6.411 to 11.30	0.9869	ns
724	25.6267	6.15858	9	24.1482	7.53471	9	1.478	-8.935 to 11.89	>0.9999	ns
ANOVA table	SS	DF	MS	F (DFn, DFd)		P value
Intensity x Genotype	41.86	8	5.232	F (8, 128) = 0.3331		P=0.9518
Intensity	12316	8	1540	F (4.349, 69.58) = 98.02		P<0.0001
Genotype	20.67	1	20.67	F (1, 16) = 0.4208		P=0.5257
Subject	785.8	16	49.11	F (16, 128) = 3.127		P=0.0002
Residual	2010	128	15.71
Extended Figure 13-2: Table related to Figure 13B: b-wave amplitude (μV)
cd.s/m2	Cone-Control			Cone-HCN1 KO			Cone-Control - Cone HCN1 KO		adj p	significant
	mean	st dev	N	mean	st dev	N	mean	95% CI
0.23	14.6279	5.52896	9	14.1711	3.7652	9	0.4569	-6.674 to 7.588	>0.9999	ns
1	37.57	11.9768	9	31.3322	7.25691	9	6.238	-8.871 to 21.35	0.8389	ns
2.4	70.4033	24.8671	9	58.79	18.0078	9	11.61	-20.94 to 44.16	0.9235	ns
7.6	127.249	32.6188	9	114.698	27.1682	9	12.55	-32.03 to 57.13	0.9805	ns
24	139.279	41.6799	9	122.47	32.1364	9	16.81	-38.72 to 72.34	0.9694	ns
77	150.403	33.8639	9	130.983	31.1951	9	19.42	-28.74 to 67.58	0.8685	ns
246	159.703	39.5332	9	145.209	34.9636	9	14.49	-40.78 to 69.77	0.9876	ns
724	180.846	48.2668	9	155.786	36.4282	9	25.06	-38.84 to 88.96	0.8802	ns
ANOVA table	SS	DF	MS	F (DFn, DFd)		P value
Intensity x Genotype	1835	7	262.1	F (7, 112) = 1.047		P=0.4027
Intensity	418604	7	59801	F (1.521, 24.33) = 238.9		P<0.0001
Genotype	6397	1	6397	F (1, 16) = 1.183		P=0.2928
Subject	86502	16	5406	F (16, 112) = 21.60		P<0.0001
Residual	28038	112	250.3
Extended Figure 13-3: Table related to Figure 13C: a-wave time to peak (ms)
cd.s/m2	Cone-Control			Cone-HCN1 KO			Cone-Control - Cone HCN1 KO		adj p	significant
	mean	st dev	N	mean	st dev	N	mean	95% CI
0.23	19.0278	5.28773	9	20.7222	4.04939	9	-1.694	-8.725 to 5.336	0.9925	ns
1	18.0556	2.57627	9	18.8611	2.38521	9	-0.8056	-4.478 to 2.867	0.9962	ns
2.4	18	2.89935	9	18.5556	1.37941	9	-0.5556	-4.118 to 3.007	0.9995	ns
7.6	15	0.856957	9	16.2222	1.64148	9	-1.222	-3.254 to 0.8100	0.4451	ns
24	13.4167	1.04583	9	14.4722	1.20185	9	-1.056	-2.725 to 0.6141	0.4138	ns
77	12.25	0.984251	9	12.6944	0.596576	9	-0.4444	-1.686 to 0.7973	0.9169	ns
246	11.4722	1.20185	9	11.8056	0.596576	9	-0.3333	-1.815 to 1.148	0.9938	ns
724	10.1667	0.216506	9	10.6667	0.450694	9	-0.5	-1.054 to 0.05412	0.0887	ns
ANOVA table	SS	DF	MS	F (DFn, DFd)		P value
Intensity x Genotype	6.894	7	0.9849	F (7, 112) = 0.2272		P=0.9781
Intensity	1559	7	222.7	F (2.189, 35.02) = 51.37		P<0.0001
Genotype	24.59	1	24.59	F (1, 16) = 3.142		P=0.0953
Subject	125.2	16	7.824	F (16, 112) = 1.805		P=0.0388
Residual	485.5	112	4.335
Extended Figure 13-4: Table related to Figure 13C: b-wave time to peak (ms)
cd.s/m2	Cone-Control			Cone-HCN1 KO			Cone-Control - Cone HCN1 KO		adj p	significant
	mean	st dev	N	mean	st dev	N	mean	95% CI
0.23	36.5	3.53553	9	37.6071	1.37581	7	-1.107	-5.444 to 3.230	0.985	ns
1	40.7222	7.98284	9	37.9167	6.102	9	2.806	-7.802 to 13.41	0.9864	ns
2.4	42.4167	6.15934	9	44.8889	3.64458	9	-2.472	-10.21 to 5.270	0.9537	ns
7.6	41.9444	4.00347	9	44.7778	2.71697	9	-2.833	-7.993 to 2.326	0.5721	ns
24	39.6944	3.63313	9	42.2778	2.19888	9	-2.583	-7.166 to 1.999	0.5329	ns
77	39.8611	6.36901	9	40.0556	1.78876	9	-0.1944	-7.923 to 7.534	>0.9999	ns
246	36.5	3.04138	9	38.5556	1.722	9	-2.056	-5.855 to 1.744	0.5763	ns
724	34.6944	2.52419	9	36.6667	1.78973	9	-1.972	-5.259 to 1.314	0.4684	ns
Mixed-effects model
Fixed effects (type III)	P value	P value summary	Statistically significant (P < 0.05)?	F (DFn, DFd)		Geisser-Greenhouse's epsilon
Intensity	<0.0001	****	Yes	F (1.991, 31.29) = 14.25		0.2845
Genotype	0.3547	ns	No	F (1, 16) = 0.9086
Intensity x Genotype	0.1732	ns	No	F (7, 110) = 1.504
Random effects	SD	Variance
Subject	2.598	6.75
Residual	3.242	10.51
Extended Figure 13-5: Table related to Figure 13D: amplitude 100 ms post flash (μV)
cd.s/m2	Cone-Control			Cone-HCN1 KO			Cone-Control - Cone HCN1 KO		adj p	significant
	mean	st dev	N	mean	st dev	N	mean	95% CI
0.23	11.5644	16.6027	9	1.63324	8.93595	9	9.931	-10.69 to 30.55	0.6993	ns
1	-2.53067	24.7327	9	-2.00567	7.34509	9	-0.525	-30.54 to 29.49	>0.9999	ns
2.4	-9.02119	8.32183	9	-15.4444	11.9344	9	6.423	-9.053 to 21.90	0.8423	ns
7.6	-12.746	22.2246	9	-8.31281	16.8577	9	-4.433	-33.90 to 25.03	0.9997	ns
24	4.3673	10.4749	9	1.92795	11.2367	9	2.439	-13.63 to 18.50	0.9997	ns
77	40.8071	22.3241	9	46.9568	14.0586	9	-6.15	-34.50 to 22.20	0.9959	ns
246	80.921	31.6735	9	98.4837	23.0922	9	-17.56	-59.10 to 23.97	0.8312	ns
724	105.774	39.7288	9	110.286	24.8932	9	-4.512	-54.91 to 45.89	>0.9999	ns
ANOVA table	SS	DF	MS	F (DFn, DFd)		P value
Intensity x Genotype	2279	7	325.6	F (7, 112) = 0.9561		P=0.4669
Intensity	280054	7	40008	F (3.172, 50.74) = 117.5		P<0.0001
Genotype	116.5	1	116.5	F (1, 16) = 0.1220		P=0.7315
Subject	15277	16	954.8	F (16, 112) = 2.804		P=0.0008
Residual	38143	112	340.6
Extended Figure 13-6: Table related to Figure 13D: amplitude 150 ms post flash (μV)
cd.s/m2	Cone-Control			Cone-HCN1 KO			Cone-Control - Cone HCN1 KO		adj p	significant
	mean	st dev	N	mean	st dev	N	mean	95% CI
0.23	10.3969	20.0732	9	2.5302	6.94608	9	7.867	-16.52 to 32.25	0.9375	ns
1	6.16849	24.0793	9	9.66919	14.6606	9	-3.501	-33.90 to 26.90	>0.9999	ns
2.4	2.35078	14.0056	9	-3.40679	19.5163	9	5.758	-19.73 to 31.25	0.9949	ns
7.6	-1.0001	25.0137	9	-4.07729	13.3178	9	3.077	-27.95 to 34.11	>0.9999	ns
24	7.47334	19.1624	9	-10.4268	16.339	9	17.9	-8.514 to 44.31	0.3322	ns
77	10.485	34.1844	9	-0.903391	16.6959	9	11.39	-30.69 to 53.47	0.9802	ns
246	33.6931	14.9054	9	37.8242	17.4886	9	-4.131	-28.23 to 19.97	0.9993	ns
724	75.3742	32.8888	9	88.9236	26.1166	9	-13.55	-57.77 to 30.67	0.9674	ns
ANOVA table	SS	DF	MS	F (DFn, DFd)		P value
Intensity x Genotype	3108	7	443.9	F (7, 112) = 1.233		P=0.2905
Intensity	107418	7	15345	F (2.930, 46.89) = 42.64		P<0.0001
Genotype	346.2	1	346.2	F (1, 16) = 0.3532		P=0.5606
Subject	15683	16	980.2	F (16, 112) = 2.723		P=0.0011
Residual	40311	112	359.9
Extended Figure 13-7: Table related to Figure 13D: amplitude 200 ms post flash (μV)
cd.s/m2	Cone-Control			Cone-HCN1 KO			Cone-Control - Cone HCN1 KO		adj p	significant
	mean	st dev	N	mean	st dev	N	mean	95% CI
0.23	6.7872	17.1777	9	0.194447	13.0063	9	-16.17 to 29.36		0.9762	ns
1	-0.271912	20.5005	9	-5.90986	11.3175	9	-19.89 to 31.17		0.9949	ns
2.4	-1.26938	14.3881	9	-9.09444	12.1076	9	-11.91 to 27.56		0.8769	ns
7.6	0.0963532	21.7749	9	-14.6991	10.9626	9	-12.07 to 41.67		0.5463	ns
24	6.86542	17.9497	9	-14.6752	11.6588	9	-1.383 to 44.46		0.0725	ns
77	1.72773	22.7913	9	-6.95217	17.1376	9	-21.46 to 38.82		0.9769	ns
246	13.4134	10.2967	9	10.62	18.3464	9	-20.10 to 25.69		>0.9999	ns
724	43.734	19.3309	9	43.3984	23.9835	9	-32.07 to 32.74		>0.9999	ns
ANOVA table	SS	DF	MS	F (DFn, DFd)		P value
Intensity x Genotype	1446	7	206.5	F (7, 112) = 0.7228		P=0.6529
Intensity	35918	7	5131	F (4.161, 66.58) = 17.96		P<0.0001
Genotype	2616	1	2616	F (1, 16) = 8.393		P=0.0105
Subject	4988	16	311.7	F (16, 112) = 1.091		P=0.3720
Residual	31999	112	285.7
Extended Figure 14-1: Table related to Figure 14B: 3cd.s/m2 flash flicker amplitude (μV)
Hz	Cone-Control			Cone-HCN1 KO			Cone-Control - Cone HCN1 KO		adj p	significant
	mean	st dev	N	mean	st dev	N	mean	95% CI
0.5	486.144	104.211	8	435.059	77.709	11	51.08	-101.3 to 203.5	0.9747	ns
1	364.744	86.5058	8	335.214	60.3888	11	29.53	-96.04 to 155.1	0.9986	ns
2	229.531	56.8506	8	225.137	59.8387	11	4.394	-85.76 to 94.55	>0.9999	ns
3	197.782	29.4951	8	179.671	38.1504	11	18.11	-33.11 to 69.34	0.9729	ns
5	185.847	29.9893	8	169.448	36.6581	11	16.4	-34.23 to 67.03	0.986	ns
7	158.71	20.4929	8	148.84	29.4952	11	9.87	-27.94 to 47.68	0.9979	ns
10	141.727	21.0055	8	121.595	21.7646	11	20.13	-13.00 to 53.26	0.522	ns
12	125.571	20.1251	8	116.675	23.3327	11	8.895	-24.27 to 42.06	0.9972	ns
15	89.5113	10.2902	8	83.6545	16.5692	11	5.857	-14.57 to 26.28	0.995	ns
18	73.1797	9.60018	8	63.4794	15.3656	11	9.7	-9.276 to 28.68	0.7522	ns
20	59.0231	8.62371	8	54.3813	12.6205	11	4.642	-11.43 to 20.72	0.9948	ns
30	32.128	4.52146	8	33.338	9.11404	11	-1.21	-11.86 to 9.436	>0.9999	ns
ANOVA table	SS	DF	MS	F (DFn, DFd)		P value
Frequency x Genotype	10229	11	929.9	F (11, 187) = 0.9504		P=0.4935
Frequency	3216439	11	292404	F (1.664, 28.29) = 298.9		P<0.0001
Genotype	12148	1	12148	F (1, 17) = 1.157		P=0.2971
Subject	178435	17	10496	F (17, 187) = 10.73		P<0.0001
Residual	182955	187	978.4
Extended Figure 14-2: Table related to Figure 14D: photopic sinusoidal flicker amplitude (μV)
Hz	Cone-Control			Cone-HCN1 KO			Cone-Control - Cone HCN1 KO		adj p	significant
	mean	st dev	N	mean	st dev	N	mean	95% CI
0.5	39.0225	13.0693	6	45.8917	15.3681	6	-6.869	-36.93 to 23.19	0.9977	ns
0.75	40.0063	4.51255	6	45.576	7.50362	6	-5.57	-19.33 to 8.195	0.847	ns
1	40.3686	3.90601	6	41.8827	6.23013	6	-1.514	-12.98 to 9.949	>0.9999	ns
1.5	43.7135	4.18824	6	45.0338	6.77619	6	-1.32	-13.77 to 11.13	>0.9999	ns
2	43.1094	4.38492	6	46.22	11.0722	6	-3.111	-23.58 to 17.36	0.9998	ns
3	40.9948	6.08768	6	46.5442	8.27956	6	-5.549	-21.13 to 10.03	0.9331	ns
6	38.6518	4.32185	6	42.5742	6.62274	6	-3.922	-16.16 to 8.311	0.9617	ns
9	31.6144	2.74467	6	33.4544	5.425	6	-1.84	-11.76 to 8.079	0.9993	ns
12	27.5336	2.08789	6	30.7872	2.82719	6	-3.254	-8.578 to 2.071	0.4242	ns
15	21.3921	3.27319	6	23.1617	2.77994	6	-1.77	-8.170 to 4.631	0.9892	ns
25	8.96717	0.935324	6	11.6307	1.12734	6	-2.664	-4.851 to -0.4757	0.0146	*
ANOVA table	SS	DF	MS	F (DFn, DFd)		P value
Frequency x Genotype	105.8	10	10.58	F (10, 100) = 0.3544		P=0.9629
Frequency	14979	10	1498	F (2.353, 23.53) = 50.18		P<0.0001
Genotype	381.1	1	381.1	F (1, 10) = 1.985		P=0.1892
Subject	1920	10	192	F (10, 100) = 6.434		P<0.0001
Residual	2985	100	29.85
Extended Figure 15-1: Table related to Figure 15B: 30Hz flicker amplitude (μV)
cd.s/m2	Cone-Control			Cone-HCN1 KO			Cone-Control - Cone HCN1 KO		adj p	significant
	mean	st dev	N	mean	st dev	N	mean	95% CI
3	50.1691	10.4932	7	50.176	11.416	11	-0.006883	-16.11 to 16.10	>0.9999	ns
10	38.4391	9.22214	7	36.2959	8.668	11	2.143	-11.48 to 15.76	0.9975	ns
30	33.8331	8.4995	7	30.6833	8.03191	11	3.15	-9.418 to 15.72	0.9718	ns
100	35.1594	4.88093	7	32.5768	7.27397	11	2.583	-6.018 to 11.18	0.9437	ns
300	35.1594	4.52909	7	33.0513	6.81824	11	2.108	-5.918 to 10.13	0.9699	ns
724	26.0431	4.82505	7	24.0568	5.54671	11	1.986	-5.557 to 9.530	0.9676	ns
ANOVA table	SS	DF	MS	F (DFn, DFd)		P value
Frequency x Genotype	24.47	5	4.895	F (5, 80) = 0.3975		P=0.8492
Frequency	5871	5	1174	F (1.980, 31.69) = 95.34		P<0.0001
Genotype	102	1	102	F (1, 16) = 0.3248		P=0.5766
Subject	5026	16	314.1	F (16, 80) = 25.51		P<0.0001
Residual	985.2	80	12.31
Extended Figure 16-1: Table related to Figure 16: amplitude of fundamental (μV)
Hz	Cone-Control			Cone-HCN1 KO			Cone-Control - Cone HCN1 KO		adj p	significant
	mean	st dev	N	mean	st dev	N	mean	95% CI
0.5	11.6717	3.11143	6	15.621	4.30624	6	-3.949	-12.03 to 4.127	0.6922	ns
0.75	10.4713	1.90312	6	14.5119	3.86479	6	-4.041	-11.11 to 3.029	0.4554	ns
1	9.70816	2.17663	6	10.1862	1.79057	6	-0.4781	-4.691 to 3.735	>0.9999	ns
1.5	9.37311	1.11526	6	10.1307	1.43133	6	-0.7576	-3.487 to 1.971	0.9882	ns
2	8.93608	1.21902	6	9.85243	2.14103	6	-0.9163	-4.834 to 3.001	0.9956	ns
3	8.14498	1.31911	6	9.28527	1.66247	6	-1.14	-4.325 to 2.045	0.934	ns
6	7.85196	1.14214	6	8.66659	1.09622	6	-0.8146	-3.158 to 1.529	0.9484	ns
9	9.22281	0.956109	6	10.1219	1.27487	6	-0.8991	-3.308 to 1.510	0.9134	ns
12	7.65716	0.552469	6	8.11206	0.90984	6	-0.4549	-2.125 to 1.215	0.9867	ns
15	5.96648	0.785425	6	6.48653	0.833242	6	-0.52	-2.216 to 1.176	0.9776	ns
25	2.5539	0.433825	6	3.37208	0.39142	6	-0.8182	-1.685 to 0.04896	0.0696	ns
ANOVA table	SS	DF	MS	F (DFn, DFd)		P value
Frequency x Genotype	52.8	10	5.28	F (10, 100) = 2.497		P=0.0102
Frequency	982.3	10	98.23	F (1.921, 19.21) = 46.46		P<0.0001
Genotype	59.65	1	59.65	F (1, 10) = 3.495		P=0.0911
Subject	170.7	10	17.07	F (10, 100) = 8.071		P<0.0001
Residual	211.5	100	2.115
Extended Figure 17-1: Table related to Figure 17B: a-wave amplitude (μV)
cd.s/m	Cone-Control			Cone-HCN1 KO			Cone-Control - Cone HCN1 KO		adj p	significant
	mean	st dev	N	mean	st dev	N	mean	95% CI
57.5	5.99842	0.88154	6	7.03271	2.29071	7	-1.034	-4.385 to 2.317	0.9194	ns
250	8.55942	1.55173	6	9.6115	1.92952	7	-1.052	-4.225 to 2.121	0.9172	ns
600	12.9072	2.6794	6	14.0757	0.906612	7	-1.168	-5.735 to 3.398	0.9496	ns
1900	16.4095	3.17418	6	16.8236	1.67133	7	-0.4141	-5.715 to 4.887	>0.9999	ns
6000	17.1333	3.12401	6	18.3379	1.47492	7	-1.205	-6.437 to 4.028	0.9768	ns
19250	21.1783	5.00879	6	21.8136	3.43465	7	-0.6352	-9.074 to 7.804	>0.9999	ns
25000	22.6858	3.14184	6	24.8279	3.26052	7	-2.142	-8.003 to 3.719	0.8717	ns
ANOVA table	SS	DF	MS	F (DFn, DFd)		P value
Intensity x Genotype	5.797	6	0.9661	F (6, 66) = 0.2421		P=0.9608
Intensity	3053	6	508.9	F (3.106, 34.17) = 127.5		P<0.0001
Genotype	27.02	1	27.02	F (1, 11) = 1.041		P=0.3296
Subject	285.5	11	25.96	F (11, 66) = 6.504		P<0.0001
Residual	263.4	66	3.991
Extended Figure 17-2: Table related to Figure 17B: b-wave amplitude (μV)
cd.s/m	Cone-Control			Cone-HCN1 KO			Cone-Control - Cone HCN1 KO		adj p	significant
	mean	st dev	N	mean	st dev	N	mean	95% CI
57.5	32.5433	6.67968	6	29.2636	3.05603	7	3.28	-7.923 to 14.48	0.9224	ns
250	81.4	12.2084	6	73.7457	9.45313	7	7.654	-13.25 to 28.56	0.8565	ns
600	98.9125	16.2344	6	88.4021	13.1329	7	10.51	-17.52 to 38.54	0.8454	ns
1900	115.307	22.1682	6	107.19	18.5084	7	8.117	-30.42 to 46.65	0.9916	ns
6000	142.197	29.4882	6	129.478	21.0495	7	12.72	-37.18 to 62.62	0.9724	ns
19250	150.068	32.3882	6	134.338	21.8451	7	15.73	-38.76 to 70.22	0.9458	ns
25000	151.376	37.2508	6	134.529	20.246	7	16.85	-45.35 to 79.04	0.9528	ns
ANOVA table	SS	DF	MS	F (DFn, DFd)		P value
Intensity x Genotype	446.5	6	74.42	F (6, 66) = 0.5534		P=0.7656
Intensity	131630	6	21938	F (1.608, 17.68) = 163.1		P<0.0001
Genotype	2586	1	2586	F (1, 11) = 1.182		P=0.3001
Subject	24062	11	2187	F (11, 66) = 16.27		P<0.0001
Residual	8875	66	134.5
Extended Figure 17-3: Table related to Figure 17C: a-wave time to peak (ms)
cd.s/m	Cone-Control			Cone-HCN1 KO			Cone-Control - Cone HCN1 KO		adj p	significant
	mean	st dev	N	mean	st dev	N	mean	95% CI
57.5	19.625	3.90112	6	22.2143	3.85527	7	-2.589	-9.726 to 4.547	0.8742	ns
250	19.6667	1.73686	6	20.8571	1.39087	7	-1.19	-4.183 to 1.802	0.8052	ns
600	19.5833	1.16905	6	20.7857	1.50989	7	-1.202	-3.648 to 1.244	0.6363	ns
1900	19	1.55724	6	19.8929	1.07874	7	-0.8929	-3.519 to 1.733	0.8877	ns
6000	19.1667	1.13652	6	21.0357	1.52362	7	-1.869	-4.305 to 0.5664	0.1826	ns
19250	20.9167	0.983192	6	21.3929	1.12599	7	-0.4762	-2.397 to 1.445	0.9811	ns
25000	20.6667	1.20069	6	21.8571	1.32961	7	-1.19	-3.497 to 1.116	0.5852	ns
ANOVA table	SS	DF	MS	F (DFn, DFd)		P value
Intensity x Genotype	9.208	6	1.535	F (6, 66) = 0.5281		P=0.7850
Intensity	33.68	6	5.614	F (2.111, 23.23) = 1.932		P=0.1658
Genotype	40.87	1	40.87	F (1, 11) = 4.972		P=0.0475
Subject	90.43	11	8.221	F (11, 66) = 2.829		P=0.0044
Residual	191.8	66	2.906
Extended Figure 17-4: Table related to Figure 17C: b-wave time to peak (ms)
cd.s/m	Cone-Control			Cone-HCN1 KO			Cone-Control - Cone HCN1 KO		adj p	significant
	mean	st dev	N	mean	st dev	N	mean	95% CI
57.5	49.8333	2.96929	6	51	6.04497	7	-1.167	-10.08 to 7.751	0.9995	ns
250	54.2917	2.12965	6	56.3214	1.90238	7	-2.03	-5.797 to 1.738	0.5277	ns
600	56.875	5.24583	6	61.9643	3.42305	7	-5.089	-13.89 to 3.714	0.4195	ns
1900	59.0833	10.8047	6	64.7143	8.05247	7	-5.631	-24.02 to 12.76	0.933	ns
6000	56.5417	2.43627	6	60.2857	2.98059	7	-3.744	-8.678 to 1.190	0.1919	ns
19250	57.375	5.66734	6	58.1786	2.62089	7	-0.8036	-10.30 to 8.697	>0.9999	ns
25000	55.125	2.9144	6	60.2143	5.54419	7	-5.089	-13.32 to 3.139	0.3649	ns
ANOVA table	SS	DF	MS	F (DFn, DFd)		P value
Intensity x Genotype	78.83	6	13.14	F (6, 66) = 0.5771		P=0.7472
Intensity	1016	6	169.3	F (2.622, 28.84) = 7.436		P=0.0012
Genotype	256	1	256	F (1, 11) = 5.661		P=0.0365
Subject	497.5	11	45.23	F (11, 66) = 1.987		P=0.0438
Residual	1503	66	22.77
Extended Figure 17-5: Table related to Figure 17D: amplitude 150 ms post onset (μV)
cd.s/m	Cone-Control			Cone-HCN1 KO			Cone-Control - Cone HCN1 KO		adj p	significant
	mean	st dev	N	mean	st dev	N	mean	95% CI
57.5	0.0169832	5.94259	6	-1.10657	10.4165	7	1.124	-14.50 to 16.74	>0.9999	ns
250	30.5572	11.4602	6	24.5293	8.56259	7	6.028	-13.48 to 25.54	0.9303	ns
600	40.6461	15.8383	6	45.7227	12.1847	7	-5.077	-32.16 to 22.01	0.9955	ns
1900	63.5035	15.1347	6	75.7825	14.0417	7	-12.28	-39.36 to 14.80	0.7085	ns
6000	74.5719	18.0668	6	79.9518	12.4041	7	-5.38	-35.82 to 25.06	0.9965	ns
19250	82.7176	22.1973	6	84.2361	10.8206	7	-1.518	-38.66 to 35.62	>0.9999	ns
25000	73.1367	25.7355	6	80.4885	17.1576	7	-7.352	-50.61 to 35.90	0.9971	ns
ANOVA table	SS	DF	MS	F (DFn, DFd)		P value
Intensity x Genotype	691.4	6	115.2	F (6, 66) = 0.8757		P=0.5177
Intensity	77114	6	12852	F (2.912, 32.03) = 97.66		P<0.0001
Genotype	276	1	276	F (1, 11) = 0.3567		P=0.5624
Subject	8511	11	773.7	F (11, 66) = 5.880		P<0.0001
Residual	8686	66	131.6
Extended Figure 17-6: Table related to Figure 17D: amplitude 250 ms post onset (μV)
cd.s/m	Cone-Control			Cone-HCN1 KO			Cone-Control - Cone HCN1 KO		adj p	significant
	mean	st dev	N	mean	st dev	N	mean	95% CI
57.5	5.00079	6.06487	6	10.491	15.6572	7	-5.49	-28.40 to 17.42	0.9771	ns
250	26.1364	10.8498	6	26.7374	13.9544	7	-0.601	-23.24 to 22.04	>0.9999	ns
600	32.1919	11.5679	6	40.5872	14.1541	7	-8.395	-31.83 to 15.03	0.8833	ns
1900	47.3603	13.8306	6	60.3013	12.5896	7	-12.94	-37.54 to 11.66	0.5554	ns
6000	41.8805	5.62577	6	55.2763	16.0519	7	-13.4	-36.88 to 10.09	0.4178	ns
19250	50.2171	25.3873	6	66.5044	19.8008	7	-16.29	-59.81 to 27.24	0.844	ns
25000	41.9616	24.5378	6	61.093	25.1855	7	-19.13	-64.69 to 26.43	0.7794	ns
ANOVA table	SS	DF	MS	F (DFn, DFd)		P value
Intensity x Genotype	803.7	6	134	F (6, 66) = 0.7565		P=0.6066
Intensity	25472	6	4245	F (2.697, 29.67) = 23.97		P<0.0001
Genotype	2683	1	2683	F (1, 11) = 3.074		P=0.1073
Subject	9599	11	872.6	F (11, 66) = 4.928		P<0.0001
Residual	11687	66	177.1
Extended Figure 17-7: Table related to Figure 17D: amplitude 500 ms post onset (μV)
cd.s/m	Cone-Control			Cone-HCN1 KO			Cone-Control - Cone HCN1 KO		adj p	significant
	mean	st dev	N	mean	st dev	N	mean	95% CI
57.5	0.957643	12.7821	6	4.45284	15.091	7	-3.495	-28.87 to 21.88	0.9995	ns
250	-10.6103	12.731	6	-7.4522	28.7265	7	-3.158	-45.30 to 38.98	>0.9999	ns
600	-11.6149	13.3025	6	1.26982	13.015	7	-12.88	-37.13 to 11.36	0.5487	ns
1900	-4.26724	12.7001	6	6.56478	13.7106	7	-10.83	-34.94 to 13.27	0.7235	ns
6000	-19.8297	14.2806	6	-7.60947	21.8476	7	-12.22	-45.84 to 21.40	0.8708	ns
19250	-11.8732	23.5921	6	4.01245	24.4625	7	-15.89	-59.88 to 28.11	0.878	ns
25000	-11.7281	26.178	6	2.01506	30.9596	7	-13.74	-65.76 to 38.28	0.9734	ns
ANOVA table	SS	DF	MS	F (DFn, DFd)		P value
Intensity x Genotype	487.9	6	81.32	F (6, 66) = 0.2541		P=0.9559
Intensity	2455	6	409.2	F (3.308, 36.39) = 1.279		P=0.2965
Genotype	2407	1	2407	F (1, 11) = 2.623		P=0.1336
Subject	10094	11	917.6	F (11, 66) = 2.868		P=0.0039
Residual	21121	66	320
Extended Figure 17-8: Table related to Figure 17E: OFF response amplitude
cd.s/m	Cone-Control			Cone-HCN1 KO			Cone-Control - Cone HCN1 KO		adj p	significant
	mean	st dev	N	mean	st dev	N	mean	95% CI
57.5	44.4743	9.18163	6	42.3157	6.39857	7	2.159	-13.34 to 17.65	0.9992	ns
250	51.0012	9.6232	6	51.6579	11.5406	7	-0.6567	-19.93 to 18.61	>0.9999	ns
600	52.4235	12.0604	6	56.1586	12.4847	7	-3.735	-26.21 to 18.74	0.9982	ns
1900	59.492	15.1943	6	59.8413	16.7244	6	-0.3492	-31.37 to 30.67	>0.9999	ns
6000	55.7247	11.9319	6	60.178	7.98848	7	-4.453	-24.51 to 15.61	0.9863	ns
19250	65.6525	17.4235	5	71.7707	4.48049	7	-6.118	-43.79 to 31.56	0.99	ns
25000	57.7161	13.1786	6	72.8758	10.853	7	-15.16	-38.00 to 7.679	0.2995	ns
Mixed-effects analysis
Fixed effects (type III)	P value	P value summary	Statistically significant (P < 0.05)?	F (DFn, DFd)		Geisser-Greenhouse's epsilon
Intensity	<0.0001	****	Yes	F (2.818, 30.06) = 13.94		0.4697
Genotype	0.4009	ns	No	F (1, 11) = 0.7636
Intensity x Genotype	0.1536	ns	No	F (6, 64) = 1.629
Random effects	SD	Variance
Subject	8.455	71.48
Residual	7.963	63.41
Extended Figure 17-9: Table related to Figure 17F: OFF response time to peak
cd.s/m	Cone-Control			Cone-HCN1 KO			Cone-Control - Cone HCN1 KO		adj p	significant
	mean	st dev	N	mean	st dev	N	mean	95% CI
57.5	116.458	8.24229	6	118.857	13.0646	7	-2.399	-22.34 to 17.55	0.9998	ns
250	98.0833	9.98457	6	101.536	14.3123	7	-3.452	-25.85 to 18.95	0.9989	ns
600	97.3333	10.7106	6	88.6667	1.41126	6	8.667	-10.20 to 27.53	0.5388	ns
1900	101.583	16.2255	6	102.143	10.1076	7	-0.5595	-27.72 to 26.60	>0.9999	ns
6000	97.625	7.80184	6	96.8571	5.78226	7	0.7679	-12.50 to 14.03	>0.9999	ns
19250	94.5417	5.90004	6	93.6071	7.6497	7	0.9345	-11.44 to 13.31	>0.9999	ns
25000	92.3333	6.01179	6	90.9643	6.90928	7	1.369	-10.40 to 13.14	0.9998	ns
Mixed-effects analysis
Fixed effects (type III)	P value	P value summary	Statistically significant (P < 0.05)?	F (DFn, DFd)		Geisser-Greenhouse's epsilon
Intensity	<0.0001	****	Yes	F (3.495, 37.86) = 18.25		0.5825
Genotype	0.8846	ns	No	F (1, 11) = 0.02206
Intensity x Genotype	0.6667	ns	No	F (6, 65) = 0.6794
Random effects	SD	Variance
Subject	6.278	39.41
Residual	7.39	54.61
Extended Figure 19-1: Table related to Figure 19: OMR contrast sensitivity (70 cd/m2)
Temporal Frequency (Hz)	Rod-Control			Rod-HCN1 KO			Rod-Control - Rod-HCN1 KO		adj p	significant
	log mean	st dev	N	log mean	st dev	N	mean	t
1.5	0.35162	0.0813327	5	0.324125	0.0651397	5	0.024	0.324	0.748	ns
3	0.52292	0.142427	5	0.451525	0.152631	5	0.0585	0.79	0.437	ns
6	0.35058	0.158393	5	0.3343	0.107632	5	0.021	0.284	0.779	ns
ANOVA table	SS	DF	MS	F	P value
Intensity x frequency	2	0.00217	0.00108	0.079	0.924
Frequency	2	0.158	0.0789	5.748	0.009
Genotype	1	0.00894	0.00894	0.652	0.427
Residual	24	0.329	0.0137
Total	29	0.498	0.0172
